# Supplementary material
Source: PubMed Central journal article supplement (PMC5687305)
Supplement: NIHMS908069-supplement-1.pdf [file NIHMS908069-supplement-1.pdf]

**Supplemental Table 1**

| <b>Table I: qPCR Primers</b> |                                                             |                       |
|------------------------------|-------------------------------------------------------------|-----------------------|
| <b>Gene</b>                  | <b>Forward Primer</b>                                       | <b>Reverse Primer</b> |
| GAPDH                        | CATGGCCTCCGTGTTCCCTA                                        | TACTTGGCAGGTTTCTCCAGG |
| IFN $\gamma$                 | CAGCAACAGCAAGGCGAAAA                                        | TCATTGAATGCTTGGCGCTG  |
| IL-17a                       | TCTTTAACTCCCTTGGCGCA                                        | TCAGGGTCTTCATTGCGGTG  |
| IL-5                         | TGAGGCTTCCTGTCCCTACT                                        | CCCCACGGACAGTTTGATT   |
| IL-10                        | QuantiTect IL-10 Primer Assay (Qiagen catalog # QT00106169) |                       |
| iNOS                         | AAGATGGCCTGGAGGAATGC                                        | TGCTGTGCTACAGTCCGAG   |
| Arg1                         | QuantiTect Arg1 Primer Assay (Qiagen catalog #QT00134288)   |                       |
| TNF $\alpha$                 | ATGGCCTCCCTCATCAGT                                          | TTTGCTACGACGTGGGCTAC  |

Table I: qPCR Primers. GAPDH served as housekeeping gene and was validated under all conditions tested. Each gene was tested in triplicated for each sample.

## Supplemental Figure 1

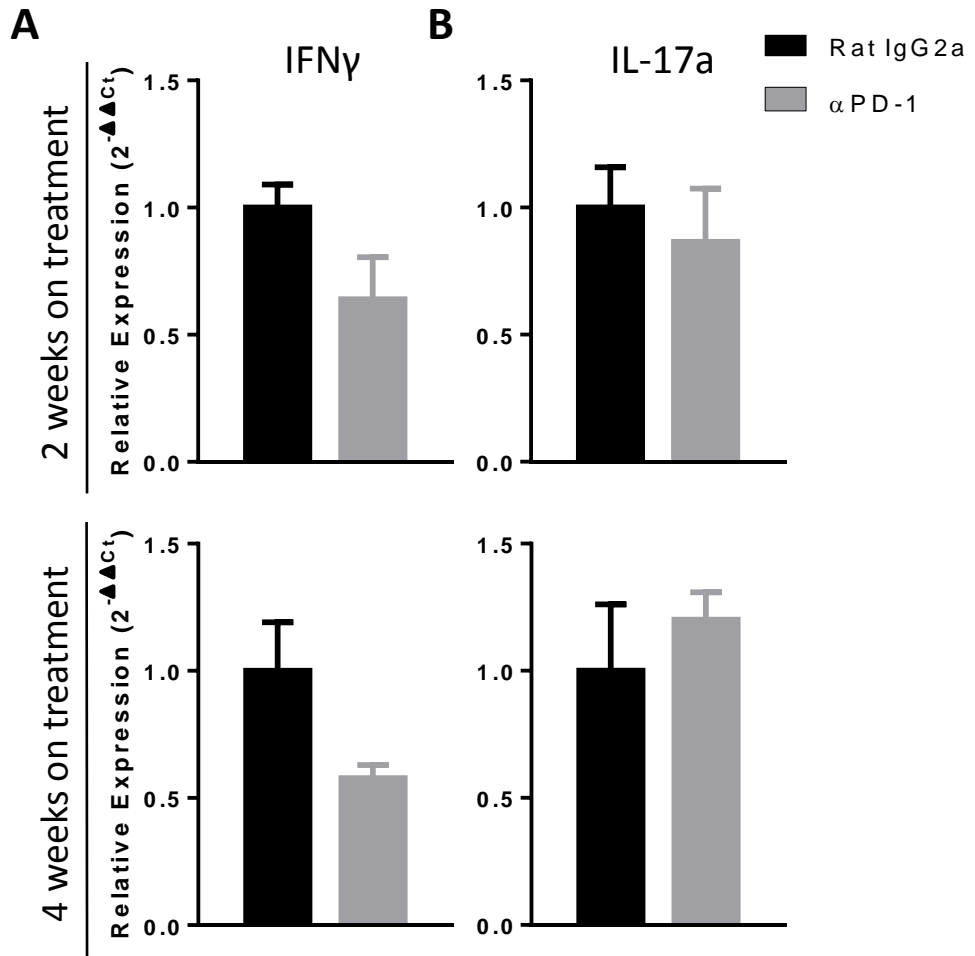

Supplemental Figure 1: Anti-PD-1 antibody treatment does not substantially alter IFN-g and IL-17a gene expression in mice with cryptococcal lung infection. Infected C57BL/6 mice treated with either neutralizing anti-PD-1 or control antibody were evaluated for (A) IFN $\gamma$  and (B) IL-17a gene expression by qPCR analysis using lung leukocytes obtained at 2 WOT (top panels) or 4 WOT (bottom panels). n=4-9/cohort assayed individually in two separate experiments; \*=p<0.05 by unpaired Student *t* test.

## Supplemental Figure 2

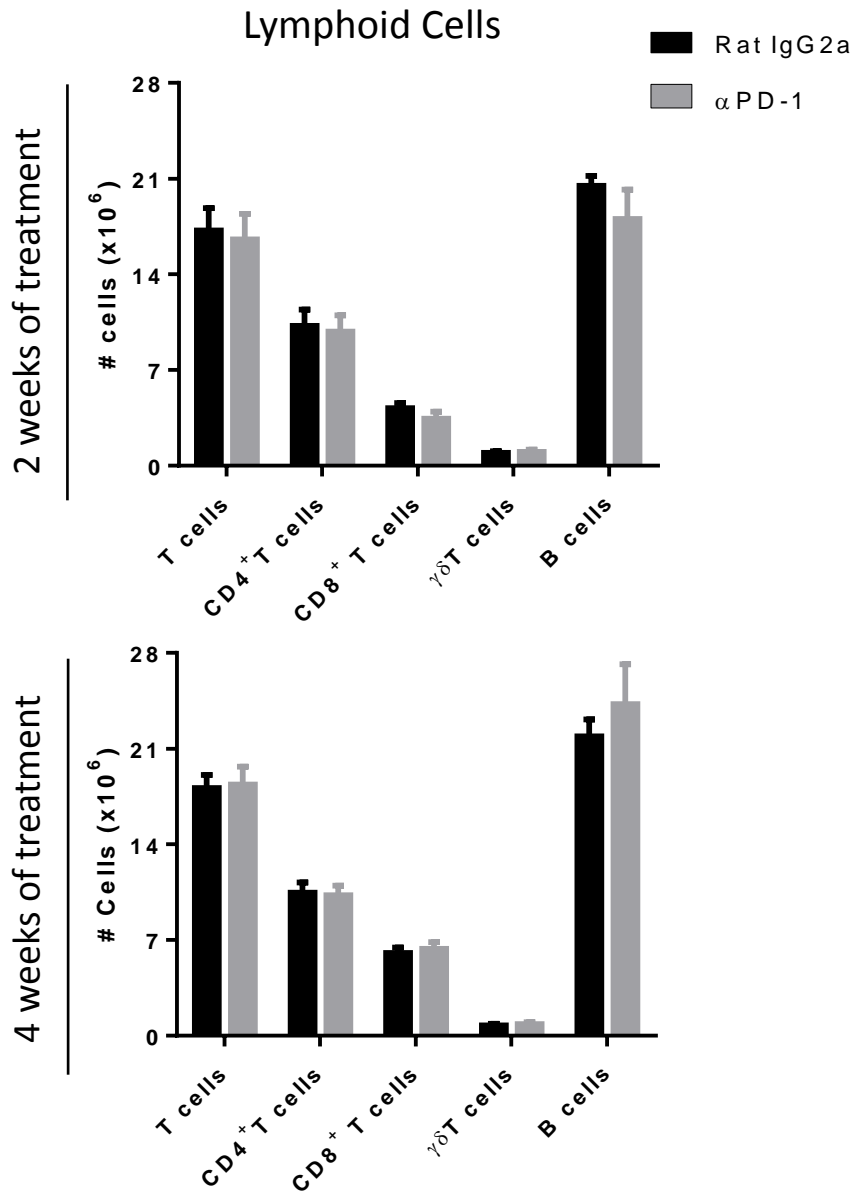

Supplemental Figure 2: Anti-PD-1 antibody treatment does not substantially alter lung lymphoid cell accumulation in the lungs of mice with cryptococcal lung infection. Infected C57BL/6 mice treated with either neutralizing anti-PD-1 or control antibody were evaluated for T and B cell accumulation at 2 WOT (top panels) or 4 WOT (bottom panels).  $n=4-9$ /cohort assayed individually in two separate experiments; \* $p<0.05$  by unpaired Student  $t$  test.
